# Supplementary material for: Magnesium and Calcium Homeostasis Depend on KCTD1 Function in the Distal Nephron
Source: PubMed Central journal article supplement — Cell Rep. Author manuscript; Available in PMC 2021 Feb 8. (PMC7869691; doi:10.1016/j.celrep.2020.108616), 2021-01-12
Supplement: NIHMS1662663-supplement-1.pdf [file NIHMS1662663-supplement-1.pdf]

**Cell Reports, Volume 34**

**Supplemental Information**

**Magnesium and Calcium Homeostasis**

**Depend on KCTD1 Function in the Distal Nephron**

**Alexander G. Marneros**

**A**

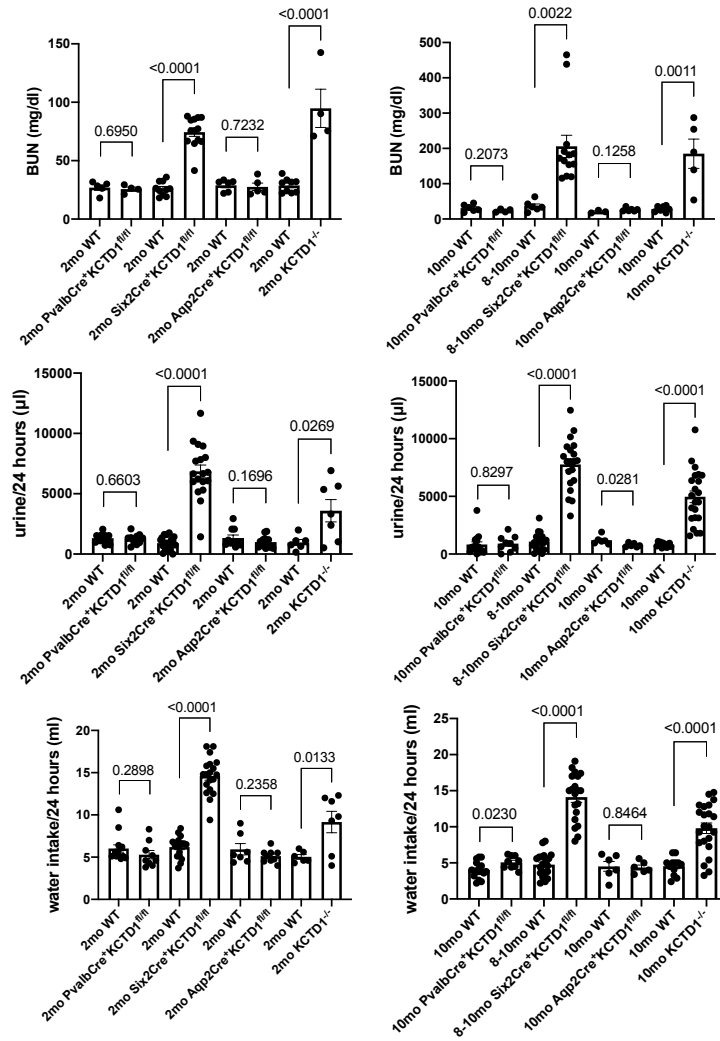

**B**

|                                               |            | Na         | K          | Cl         | Na/K ratio | BUN        | Cre        | Ca         | phosphorous | Mg                | albumin    | TP         |
|-----------------------------------------------|------------|------------|------------|------------|------------|------------|------------|------------|-------------|-------------------|------------|------------|
| control                                       | 2mo (n=5)  | 150.60     | 7.70       | 107.40     | 19.60      | 26.94      | 0.28       | 11.46      | 9.88        | 2.80              | 2.48       | 5.08       |
| PvalbCre <sup>+</sup> KCTD1 <sup>fl/fl</sup>  | 2mo (n=4)  | 151.50     | 8.00       | 108.50     | 19.25      | 25.68      | 0.23       | 11.40      | 9.58        | 2.28              | 2.45       | 5.00       |
| <i>ttest control vs KO</i>                    |            | 0.12687037 | 0.49325971 | 0.42469636 | 0.75408365 | 0.69502674 | 0.28740834 | 0.72943431 | 0.51613975  | <b>0.00039824</b> | 0.68452834 | 0.52988373 |
| control                                       | 2mo (n=8)  | 150.13     | 7.85       | 109.13     | 19.63      | 26.50      | 0.26       | 11.34      | 9.94        | 2.79              | 2.63       | 5.24       |
| PvalbCre <sup>+</sup> TFAP2B <sup>fl/fl</sup> | 2mo (n=4)  | 148.25     | 8.05       | 111.25     | 18.75      | 27.20      | 0.20       | 10.80      | 7.90        | 1.95              | 3.23       | 5.90       |
| <i>ttest control vs KO</i>                    |            | 0.14552826 | 0.77233899 | 0.19893743 | 0.64878761 | 0.79469171 | 0.13213259 | 0.27678437 | 0.02197912  | <b>0.00318728</b> | 0.03807475 | 0.07375455 |
| control                                       | 10mo (n=6) | 151.00     | 10.30      | 114.33     | 15.00      | 31.02      | 0.24       | 12.12      | 10.07       | 3.32              | 2.65       | 5.68       |
| PvalbCre <sup>+</sup> KCTD1 <sup>fl/fl</sup>  | 10mo (n=4) | 152.25     | 8.45       | 112.25     | 18.25      | 23.63      | 0.23       | 11.03      | 7.43        | 2.48              | 2.73       | 5.58       |
| <i>ttest control vs KO</i>                    |            | 0.41584649 | 0.0463292  | 0.18731496 | 0.02898833 | 0.20731261 | 0.24150397 | 0.07387967 | 0.04569195  | <b>0.00031776</b> | 0.48604202 | 0.39248571 |
| control                                       | 10mo (n=6) | 151.00     | 10.30      | 114.33     | 15.00      | 31.02      | 0.23       | 12.12      | 10.07       | 3.32              | 2.65       | 5.68       |
| PvalbCre <sup>+</sup> TFAP2B <sup>fl/fl</sup> | 10mo (n=3) | 151.00     | 7.77       | 111.00     | 19.67      | 33.30      | 0.20       | 12.57      | 9.00        | 2.83              | 2.93       | 5.77       |
| <i>ttest control vs KO</i>                    |            | 1          | 0.02525945 | 0.08056513 | 0.01384075 | 0.7152906  | 0.31589066 | 0.50825974 | 0.43909094  | <b>0.02624803</b> | 0.05904942 | 0.61690303 |

**Figure S1: Kidney function in PvalbCre+KCTD1<sup>fl/fl</sup> mice.**

- (A) Measurements of BUN serum levels (in mg/dl), 24-hour urine production and 24-hour water intake in 2-month-old and 10-month-old groups of PvalbCre+KCTD1<sup>fl/fl</sup> mice, Six2Cre+KCTD1<sup>fl/fl</sup> mice, Aqp2Cre+KCTD1<sup>fl/fl</sup> mice, KCTD1<sup>-/-</sup> mice and their respective WT controls.
- (B) Serum chemistries in 2-month-old and 10-month-old groups of PvalbCre+KCTD1<sup>fl/fl</sup> mice, PvalbCre+TFAP2B<sup>fl/fl</sup> mice and their control littermates. BUN, creatinine, magnesium, phosphorus and total calcium in mg/dl. Chloride, potassium and sodium in mEq/l. Albumin and total protein in g/dl.

Related to Figure 1.

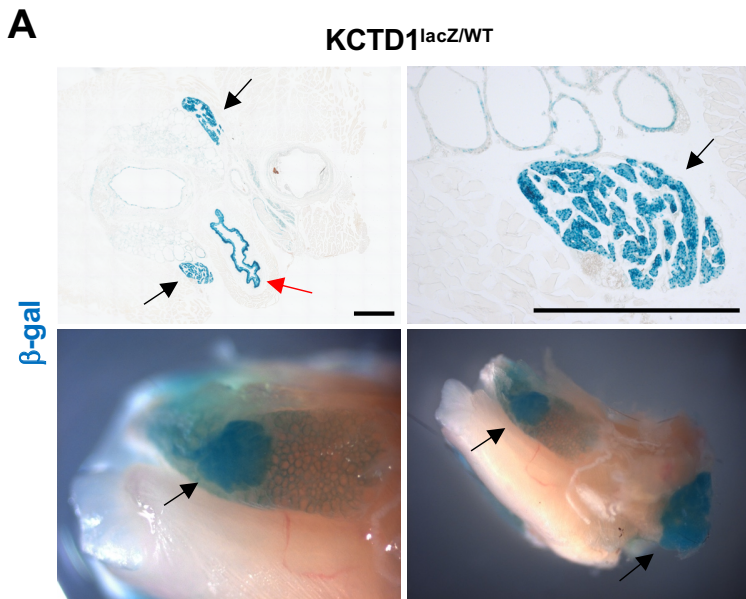

**Figure S2: KCTD1 is expressed in PTGs and Six2Cre<sup>+</sup> mice show Cre activity in the nephron epithelium except the CDs but no activity in PTGs that are targeted by PTHCre<sup>+</sup> mice.**

(A) Staining for β-galactosidase in KCTD1<sup>lacZ/WT</sup> mice shows that KCTD1 is strongly expressed in PTGs (black arrows). The epithelium of the esophagus shows KCTD1 expression as well (red arrow). Scale bars, 500μm.

(B) Top: Adult Six2Cre<sup>+</sup>ROSA26Sor<sup>tm3(CAG-EYFP)</sup> (Ai3) reporter mice show strong Cre activity (red, GFP immunolabeling) in the nephron (white arrow) except the CDs (Aqp2, white; yellow arrow). Bottom: No Cre activity is observed in the PTGs (green arrows) of these mice. Scale bars, 100μm.

(C) Adult PTHCre<sup>+</sup>ROSA26Sor<sup>tm3(CAG-EYFP)</sup> (Ai3) reporter mice show strong Cre activity in the PTGs (green). Scale bar, 500μm.

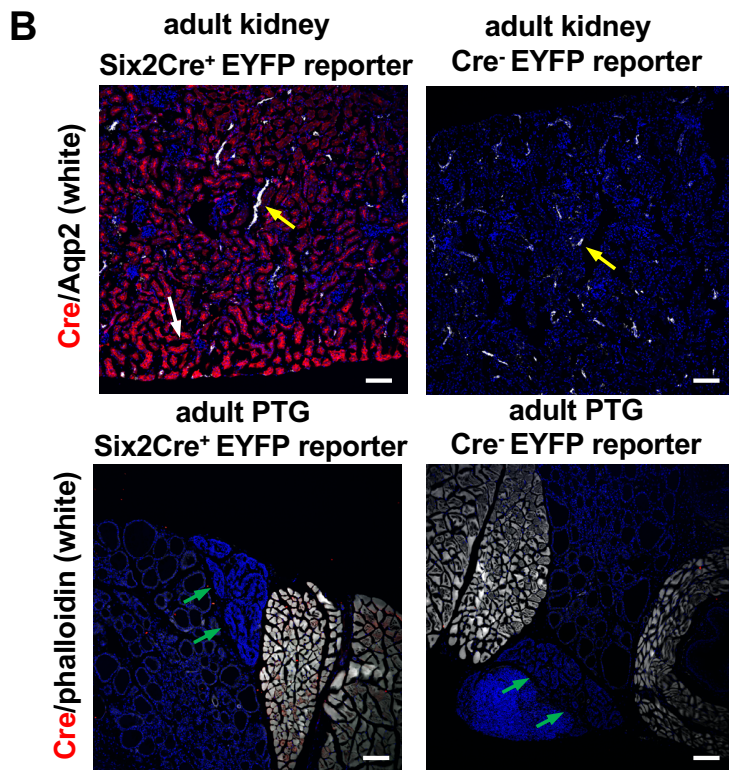

**Related to Figure 3.**

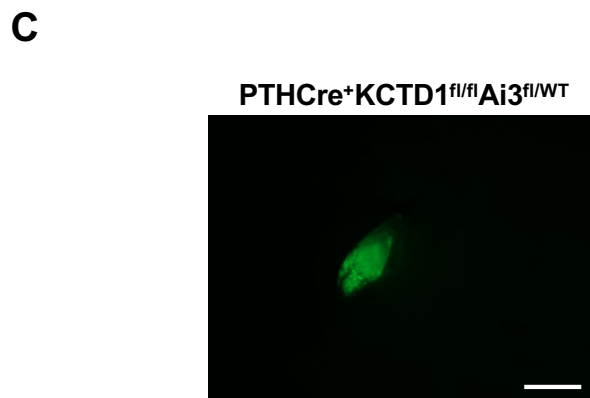

**Figure S2**

| Primer Name          | Primer Sequence (5' to 3') UP | Primer Sequence (5' to 3') DW |
|----------------------|-------------------------------|-------------------------------|
| <b>mouse primers</b> |                               |                               |
| 36b4                 | TCACTGTGCCAGCTCAGAAC          | AA TTTCAA TGGTGCCTCTGG        |
| Trpv6                | GTCATGTACTTTGCCAGAGGA         | TATAGAAGGCTGAAGCAAATCCCA      |
| Trpv5                | GAAACTTCTCAATTGGTGGGTCAG      | TTTGCCGGAAGTCACAGTT           |
| Clcnkb               | GTGGGTCCTTTTTACAACGC          | CTGGAGCAAGTGATCCAAGTC         |
| Pth1rvar2            | CAGGCGCAATGTGACAAGC           | TTCCCGGTGCCTTCTCTTTC          |
| Kcnj1 (ROMK)         | CATCCTTTCTGTCAGTGCCC          | GAACAGCACCCTCACTTG            |
| Atp1a1               | GGGGTTGGACGAGACAAGTAT         | CGGCTCAAATCTGTTCCGTAT         |
| Claudin-19           | TCCTCTTGGCAGGTCTCTGT          | GTGCAGCAGAGAAAGGAACC          |
| Claudin-16           | CAAACGCTTTTGATGGGATTC         | TTTGTGGGTCATCAGGTAGG          |
| Slc34a3              | AGACAGGCACCAGGTACCAC          | CAGCCCTGCAGACATGTTAAT         |
| Slc34a1              | TTGTCAGCATGGTCTCCTCC          | CAAAAGCCCGCCTGAAGTC           |
| Claudin-14           | ACCCTGCTCTGCTTATCC            | GCACGGTTGTCCTTGTAG            |
| NKCC2 (Slc12a1)      | ATGCCTCGTATGCCAAATCT          | CCCACATGTTGTAATCCATA          |
| TRPM6                | CCTTGGGGAGTCATTGAGAAC         | CAGTCCCATCATCACACAGG          |
| NCX1                 | TGAGAGGGACCAAGATGATGAGGAA     | TGACCCAAGACAAGCAATTGAAGAA     |
| calbindin D28K       | ACTCTCAAACCTAGCCGCTGCA        | TCAGCGTCGAAATGAAGCC           |

**Table S1: Primers used for semiquantitative RT-PCR.**

**Related to STAR methods.**
